# Supplementary material for: Scanning Near-Field EllipsometryMicroscopy: imaging nanomaterials with resolution below the diffraction limit
Source: Royal Society of Chemistry journal article supplement (doi:10.1039/c0nr00530d), 2010-11-01
Supplement: c0nr00530d.pdf [file c0nr00530d.pdf]

## Supporting information

# Scanning Near-Field Ellipsometry Microscopy: Imaging Nanomaterials with Resolution Below the Diffraction Limit

Davide Tranchida, Jordi Diaz, Peter Schön, Holger Schönherr, and G. Julius Vancso

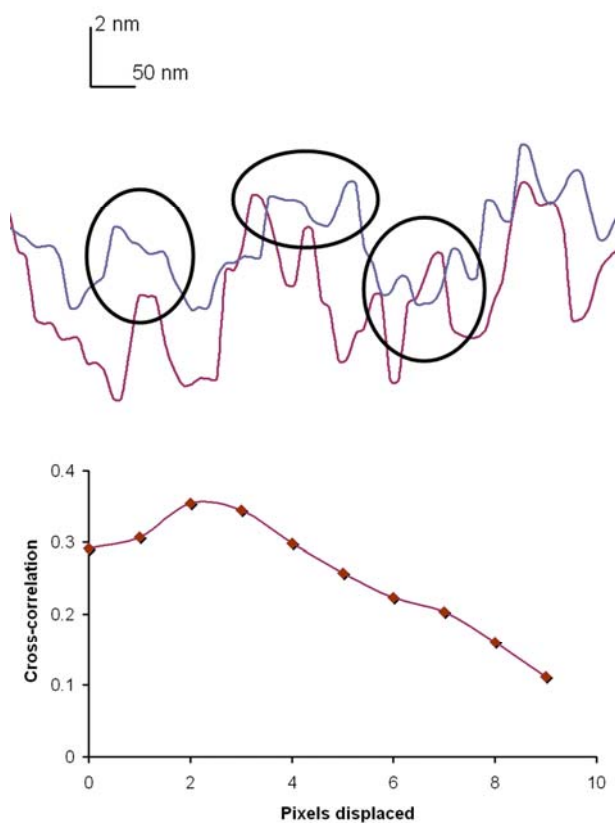

**Figure S-1.** Top: Section of a scan line of Figure 7, showing the superposition of the topographic (purple) and optical (blue) signals. A mismatch between the two profiles is observed, as pointed out by circles in the figure. Bottom: cross correlation between two (topography and optical) profiles obtained from Figure 7. It is shown that correlation shows a maximum if the optical profile is shifted of 2 pixels to the right.
